# Supplementary material
Source: publisher figshare collection journal article supplement (https://acs.figshare.com/ndownloader/files/5687103)
Supplement: Supplementary file 1 [file 5687103]

# ic000154f.cif

COMPOUND   1
 
data_shel93                                             
 
_audit_creation_method            SHELXL 
_chemical_name_systematic 
; 
 ? 
; 
_chemical_name_common             ? 
_chemical_formula_moiety          ? 
_chemical_formula_structural      ? 
_chemical_formula_analytical      '[ReO{S(CH3)CONCH2COO)}{P(C6H4O)(C6H5)2}].N(C4H9)4 
_chemical_formula_sum             'C39 H55 N2 O5 P Re S' 
_chemical_formula_weight          881.08 
_chemical_melting_point           ? 
_chemical_compound_source         ? 
 
loop_ 
 _atom_type_symbol 
 _atom_type_description 
 _atom_type_scat_dispersion_real 
 _atom_type_scat_dispersion_imag 
 _atom_type_scat_source 
 'C'  'C'   0.0033   0.0016 
 'International Tables Vol C Tables 4.2.6.8 and 6.1.1.4' 
 'H'  'H'   0.0000   0.0000 
 'International Tables Vol C Tables 4.2.6.8 and 6.1.1.4' 
 'N'  'N'   0.0061   0.0033 
 'International Tables Vol C Tables 4.2.6.8 and 6.1.1.4' 
 'O'  'O'   0.0106   0.0060 
 'International Tables Vol C Tables 4.2.6.8 and 6.1.1.4' 
 'S'  'S'   0.1246   0.1234 
 'International Tables Vol C Tables 4.2.6.8 and 6.1.1.4' 
 'P'  'P'   0.1023   0.0942 
 'International Tables Vol C Tables 4.2.6.8 and 6.1.1.4' 
 'Re'  'Re'  -1.0185   7.2310 
 'International Tables Vol C Tables 4.2.6.8 and 6.1.1.4' 
 
_symmetry_cell_setting            'monoclinic' 
_symmetry_space_group_name_H-M    P21/n 
 
loop_ 
 _symmetry_equiv_pos_as_xyz 
 'x, y, z' 
 '-x+1/2, y+1/2, -z+1/2' 
 '-x, -y, -z' 
 'x-1/2, -y-1/2, z-1/2' 
 
_cell_length_a                    8.910(3) 
_cell_length_b                    23.466(8) 
_cell_length_c                    19.114(8) 
_cell_angle_alpha                 90.00 
_cell_angle_beta                  89.99(1) 
_cell_angle_gamma                 90.00 
_cell_volume                      3996(1) 
_cell_formula_units_Z             4 
_cell_measurement_temperature     298 
_cell_measurement_reflns_used     25 
_cell_measurement_theta_min       5.3 
_cell_measurement_theta_max       11.5 
 
_exptl_crystal_description        'parallelipiped' 
_exptl_crystal_colour             'red' 
_exptl_crystal_size_max           0.50 
_exptl_crystal_size_mid           0.20 
_exptl_crystal_size_min           0.10 
_exptl_crystal_density_meas       1.44 
_exptl_crystal_density_diffrn     1.464 
_exptl_crystal_density_method     'floating method' 
_exptl_crystal_F_000              1796 
_exptl_absorpt_coefficient_mu     3.176 
_exptl_absorpt_correction_type    'psi-scan empirical' 
_exptl_absorpt_correction_T_min   0.82 
_exptl_absorpt_correction_T_max   1.00 
 
_exptl_special_details 
; 
 ? 
; 
 
_diffrn_ambient_temperature       298 
_diffrn_radiation_wavelength      0.71073 
_diffrn_radiation_type            MoK\a 
_diffrn_radiation_source          'fine-focus sealed tube' 
_diffrn_radiation_monochromator   graphite 
_diffrn_measurement_device        'Crystal Logic Dual Goniometer diffractometer' 
_diffrn_measurement_method        'theta-2theta scans' 
_diffrn_standards_number          3 
_diffrn_standards_interval_count  97 
_diffrn_standards_interval_time   ? 
_diffrn_standards_decay_%         -2.3 
_diffrn_reflns_number             6710 
_diffrn_reflns_av_R_equivalents   0.0186 
_diffrn_reflns_av_sigmaI/netI     0.0519 
_diffrn_reflns_limit_h_min        0 
_diffrn_reflns_limit_h_max        10 
_diffrn_reflns_limit_k_min        0 
_diffrn_reflns_limit_k_max        26 
_diffrn_reflns_limit_l_min        -21 
_diffrn_reflns_limit_l_max        21 
_diffrn_reflns_theta_min          1.74 
_diffrn_reflns_theta_max          24.00 
_reflns_number_total              6268 
_reflns_number_observed           5045 
_reflns_observed_criterion        >2sigma(I) 
 
_computing_data_collection        'Program COLLECT (UCLA Crystallographic package, C.E.Strouse, 1994)' 
_computing_cell_refinement        'Program LEAST (UCLA Crystallographic package, C.E.Strouse, 1994)'
_computing_data_reduction         'Program REDUCE (UCLA Crystallographic package, C.E.Strouse, 1994)'
_computing_structure_solution     'SHELXS-86 (Sheldrick, 1990)' 
_computing_structure_refinement   'SHELXL-93 (Sheldrick, 1993)' 
_computing_molecular_graphics     'ORTEP' 
_computing_publication_material   ? 
 
_refine_special_details 
; 
 Refinement on F^2^ for ALL reflections except for 0 with very negative F^2^ 
 or flagged by the user for potential systematic errors.  Weighted R-factors 
 wR and all goodnesses of fit S are based on F^2^, conventional R-factors R 
 are based on F, with F set to zero for negative F^2^. The observed criterion 
 of F^2^ > 2sigma(F^2^) is used only for calculating _R_factor_obs etc. and is 
 not relevant to the choice of reflections for refinement.  R-factors based 
 on F^2^ are statistically about twice as large as those based on F, and R- 
 factors based on ALL data will be even larger. 
; 
 
_refine_ls_structure_factor_coef  Fsqd  
_refine_ls_matrix_type            full 
_refine_ls_weighting_scheme 
 'calc w=1/[\s^2^(Fo^2^)+(0.0118P)^2^+7.8702P] where P=(Fo^2^+2Fc^2^)/3' 
_atom_sites_solution_primary      direct 
_atom_sites_solution_secondary    difmap 
_atom_sites_solution_hydrogens    geom 
_refine_ls_hydrogen_treatment     ? 
_refine_ls_extinction_method      none 
_refine_ls_extinction_coef        ? 
_refine_ls_number_reflns          6268 
_refine_ls_number_parameters      504 
_refine_ls_number_restraints      0 
_refine_ls_R_factor_all           0.0579 
_refine_ls_R_factor_obs           0.0410 
_refine_ls_wR_factor_all          0.1002 
_refine_ls_wR_factor_obs          0.0918 
_refine_ls_goodness_of_fit_all    1.186 
_refine_ls_goodness_of_fit_obs    1.223 
_refine_ls_restrained_S_all       1.186 
_refine_ls_restrained_S_obs       1.223 
_refine_ls_shift/esd_max          -0.105 
_refine_ls_shift/esd_mean         0.005 
 
loop_ 
 _atom_site_label 
 _atom_site_type_symbol 
 _atom_site_fract_x 
 _atom_site_fract_y 
 _atom_site_fract_z 
 _atom_site_U_iso_or_equiv 
 _atom_site_thermal_displace_type 
 _atom_site_occupancy 
 _atom_site_calc_flag 
 _atom_site_refinement_flags 
 _atom_site_disorder_group 
Re1 Re 0.15284(3) -0.125058(12) 0.258373(12) 0.04836(11) Uani 1 d . . 
O1 O 0.3364(5) -0.1342(3) 0.2386(3) 0.080(2) Uani 1 d . . 
O2 O -0.0783(5) -0.1179(2) 0.2480(2) 0.0573(12) Uani 1 d . . 
O3 O 0.0933(6) -0.2083(2) 0.2244(2) 0.0626(12) Uani 1 d . . 
P P 0.1201(2) -0.07505(7) 0.14779(8) 0.0420(4) Uani 1 d . . 
S1 S 0.1523(3) -0.04291(9) 0.32342(10) 0.0814(6) Uani 1 d . . 
N1 N 0.1085(7) -0.1632(3) 0.3500(3) 0.0592(15) Uani 1 d . . 
C1 C 0.0533(8) -0.2433(3) 0.2732(4) 0.063(2) Uani 1 d . . 
O4 O 0.0142(8) -0.2926(2) 0.2617(3) 0.092(2) Uani 1 d . . 
C2 C 0.0549(11) -0.2215(4) 0.3464(5) 0.075(2) Uani 1 d . . 
H2A H -0.0421(103) -0.2221(37) 0.3667(46) 0.100(22) Uiso 1 d . . 
H2B H 0.1021(107) -0.2433(38) 0.3722(48) 0.100(22) Uiso 1 d . . 
C3 C 0.1087(11) -0.1354(4) 0.4116(4) 0.084(3) Uani 1 d . . 
O5 O 0.0677(10) -0.1579(3) 0.4663(3) 0.121(3) Uani 1 d . . 
C4 C 0.1632(15) -0.0738(4) 0.4117(4) 0.102(3) Uani 1 d . . 
C5 C 0.3009(32) -0.0695(11) 0.4436(12) 0.133(15) Uani 0.51(3) d P . 
C5A C 0.1122(48) -0.0376(11) 0.4635(10) 0.157(18) Uani 0.49(3) d P . 
C6 C -0.1520(7) -0.1029(3) 0.1915(3) 0.0458(14) Uani 1 d . . 
C7 C -0.3093(7) -0.1083(3) 0.1865(4) 0.055(2) Uani 1 d . . 
C8 C -0.3826(8) -0.0943(3) 0.1271(4) 0.063(2) Uani 1 d . . 
C9 C -0.3078(9) -0.0741(4) 0.0695(4) 0.068(2) Uani 1 d . . 
C10 C -0.1548(8) -0.0676(3) 0.0723(4) 0.056(2) Uani 1 d . . 
C11 C -0.0763(6) -0.0811(3) 0.1331(3) 0.0451(14) Uani 1 d . . 
C12 C 0.2148(7) -0.1038(3) 0.0705(3) 0.0451(14) Uani 1 d . . 
C13 C 0.2579(8) -0.0688(3) 0.0151(3) 0.057(2) Uani 1 d . . 
C14 C 0.3264(10) -0.0917(4) -0.0425(4) 0.071(2) Uani 1 d . . 
C15 C 0.3502(10) -0.1494(4) -0.0467(5) 0.073(2) Uani 1 d . . 
C16 C 0.3095(10) -0.1836(4) 0.0067(5) 0.075(2) Uani 1 d . . 
C17 C 0.2410(9) -0.1617(3) 0.0660(4) 0.062(2) Uani 1 d . . 
C18 C 0.1675(7) 0.0010(3) 0.1470(3) 0.0438(14) Uani 1 d . . 
C19 C 0.0689(9) 0.0420(3) 0.1222(4) 0.057(2) Uani 1 d . . 
C20 C 0.1102(12) 0.0982(4) 0.1205(5) 0.075(2) Uani 1 d . . 
C21 C 0.2474(13) 0.1148(4) 0.1445(5) 0.083(3) Uani 1 d . . 
C22 C 0.3433(12) 0.0746(4) 0.1707(5) 0.079(3) Uani 1 d . . 
C23 C 0.3071(8) 0.0176(3) 0.1724(4) 0.062(2) Uani 1 d . . 
N2 N 0.0793(8) -0.1753(3) 0.6805(3) 0.076(2) Uani 1 d . . 
C31 C 0.1376(13) -0.1232(4) 0.7149(6) 0.107(3) Uani 1 d . . 
H31A H 0.0615(13) -0.1097(4) 0.7472(6) 0.189(22) Uiso 1 calc R . 
H31B H 0.2243(13) -0.1339(4) 0.7426(6) 0.189(22) Uiso 1 calc R . 
C32 C 0.1814(14) -0.0751(5) 0.6698(6) 0.117(4) Uani 1 d . . 
H32A H 0.0919(14) -0.0587(5) 0.6491(6) 0.258(32) Uiso 1 calc R . 
H32B H 0.2439(14) -0.0893(5) 0.6321(6) 0.258(32) Uiso 1 calc R . 
C33 C 0.2667(17) -0.0286(5) 0.7093(7) 0.138(5) Uani 1 d . . 
H33A H 0.2017(17) -0.0121(5) 0.7447(7) 0.180(20) Uiso 1 calc R . 
H33B H 0.3525(17) -0.0453(5) 0.7328(7) 0.180(20) Uiso 1 calc R . 
C34 C 0.3186(19) 0.0167(6) 0.6615(8) 0.181(7) Uani 1 d . . 
H34A H 0.3908(103) 0.0403(33) 0.6850(24) 0.249(49) Uiso 1 calc R . 
H34B H 0.2346(27) 0.0396(33) 0.6473(51) 0.249(49) Uiso 1 calc R . 
H34C H 0.3641(129) -0.0002(6) 0.6210(32) 0.249(49) Uiso 1 calc R . 
C35 C 0.0188(13) -0.2172(5) 0.7345(5) 0.112(3) Uani 1 d . . 
H35A H -0.0590(13) -0.1979(5) 0.7609(5) 0.189(22) Uiso 1 calc R . 
H35B H -0.0290(13) -0.2482(5) 0.7094(5) 0.189(22) Uiso 1 calc R . 
C36 C 0.1252(13) -0.2423(5) 0.7849(5) 0.106(3) Uani 1 d . . 
H36A H 0.1800(13) -0.2121(5) 0.8082(5) 0.258(32) Uiso 1 calc R . 
H36B H 0.1971(13) -0.2658(5) 0.7600(5) 0.258(32) Uiso 1 calc R . 
C37 C 0.0457(14) -0.2777(5) 0.8382(5) 0.114(4) Uani 1 d . . 
H37A H -0.0144(14) -0.2523(5) 0.8669(5) 0.180(20) Uiso 1 calc R . 
H37B H -0.0233(14) -0.3027(5) 0.8136(5) 0.180(20) Uiso 1 calc R . 
C38 C 0.1347(18) -0.3126(5) 0.8847(6) 0.143(5) Uani 1 d . . 
H38A H 0.0696(18) -0.3336(31) 0.9152(34) 0.199(37) Uiso 1 calc R . 
H38B H 0.1994(80) -0.2886(6) 0.9120(37) 0.199(37) Uiso 1 calc R . 
H38C H 0.1943(83) -0.3386(29) 0.8576(7) 0.199(37) Uiso 1 calc R . 
C39 C 0.2113(14) -0.2012(5) 0.6389(6) 0.118(4) Uani 1 d . . 
H39A H 0.2472(14) -0.1721(5) 0.6069(6) 0.189(22) Uiso 1 calc R . 
H39B H 0.2917(14) -0.2085(5) 0.6719(6) 0.189(22) Uiso 1 calc R . 
C40 C 0.1909(20) -0.2505(6) 0.6002(8) 0.168(7) Uani 1 d . . 
H40A H 0.1143(20) -0.2435(6) 0.5652(8) 0.258(32) Uiso 1 calc R . 
H40B H 0.1539(20) -0.2801(6) 0.6311(8) 0.258(32) Uiso 1 calc R . 
C41 C 0.3334(25) -0.2724(10) 0.5633(12) 0.223(9) Uiso 1 d . . 
H41A H 0.4137(25) -0.2669(10) 0.5969(12) 0.180(20) Uiso 1 calc R . 
H41B H 0.3197(25) -0.3132(10) 0.5594(12) 0.180(20) Uiso 1 calc R . 
C42 C 0.3768(27) -0.2601(10) 0.5169(11) 0.297(15) Uiso 1 d . . 
H42A H 0.4588(69) -0.2847(25) 0.5047(25) 0.189(34) Uiso 1 calc R . 
H42B H 0.4121(93) -0.2216(16) 0.5204(17) 0.189(34) Uiso 1 calc R . 
H42C H 0.3007(39) -0.2624(37) 0.4815(14) 0.189(34) Uiso 1 calc R . 
C43 C -0.0429(14) -0.1644(5) 0.6285(6) 0.117(4) Uani 1 d . . 
H43A H -0.0010(14) -0.1425(5) 0.5901(6) 0.189(22) Uiso 1 calc R . 
H43B H -0.0752(14) -0.2007(5) 0.6096(6) 0.189(22) Uiso 1 calc R . 
C44 C -0.1753(14) -0.1342(6) 0.6545(7) 0.135(5) Uani 1 d . . 
H44A H -0.1464(14) -0.0973(6) 0.6729(7) 0.258(32) Uiso 1 calc R . 
H44B H -0.2219(14) -0.1559(6) 0.6918(7) 0.258(32) Uiso 1 calc R . 
C45 C -0.2901(23) -0.1264(8) 0.5915(10) 0.194(7) Uiso 1 d . . 
H45A H -0.2389(23) -0.1073(8) 0.5534(10) 0.180(20) Uiso 1 calc R . 
H45B H -0.3203(23) -0.1637(8) 0.5750(10) 0.180(20) Uiso 1 calc R . 
C46 C -0.4083(31) -0.0978(11) 0.6072(13) 0.257(11) Uiso 1 d . . 
H7 H -0.3634(61) -0.1230(22) 0.2192(29) 0.029(14) Uiso 1 d . . 
H8 H -0.4936(82) -0.0957(28) 0.1280(35) 0.065(20) Uiso 1 d . . 
H9 H -0.3549(93) -0.0603(33) 0.0294(43) 0.089(27) Uiso 1 d . . 
H10 H -0.1107(68) -0.0559(25) 0.0417(31) 0.037(18) Uiso 1 d . . 
H13 H 0.2398(65) -0.0274(26) 0.0152(29) 0.043(16) Uiso 1 d . . 
H14 H 0.3439(81) -0.0700(31) -0.0775(38) 0.065(22) Uiso 1 d . . 
H15 H 0.3863(88) -0.1639(32) -0.0832(41) 0.075(25) Uiso 1 d . . 
H16 H 0.3310(72) -0.2194(29) 0.0029(33) 0.050(19) Uiso 1 d . . 
H17 H 0.2152(72) -0.1856(28) 0.1058(34) 0.057(19) Uiso 1 d . . 
H19 H -0.0118(70) 0.0285(26) 0.1105(32) 0.042(19) Uiso 1 d . . 
H20 H 0.0510(97) 0.1265(34) 0.1066(45) 0.086(29) Uiso 1 d . . 
H21 H 0.2546(74) 0.1553(30) 0.1471(33) 0.059(20) Uiso 1 d . . 
H22 H 0.4218(88) 0.0844(32) 0.1905(38) 0.066(24) Uiso 1 d . . 
H23 H 0.3838(83) -0.0109(30) 0.1914(37) 0.072(23) Uiso 1 d . . 
 
loop_ 
 _atom_site_aniso_label 
 _atom_site_aniso_U_11 
 _atom_site_aniso_U_22 
 _atom_site_aniso_U_33 
 _atom_site_aniso_U_23 
 _atom_site_aniso_U_13 
 _atom_site_aniso_U_12 
Re1 0.0452(2) 0.0595(2) 0.04038(15) 0.01184(13) -0.00186(10) 0.00215(13) 
O1 0.042(3) 0.124(5) 0.075(4) 0.030(3) -0.004(2) 0.006(3) 
O2 0.042(2) 0.078(3) 0.051(3) 0.019(2) 0.008(2) 0.005(2) 
O3 0.073(3) 0.054(3) 0.060(3) 0.003(2) -0.003(2) 0.000(2) 
P 0.0354(8) 0.0524(9) 0.0383(8) 0.0079(7) 0.0000(6) -0.0014(7) 
S1 0.124(2) 0.0692(13) 0.0508(11) 0.0049(9) -0.0082(11) -0.0072(13) 
N1 0.066(4) 0.073(4) 0.039(3) 0.018(3) 0.002(3) 0.009(3) 
C1 0.059(4) 0.053(4) 0.076(5) 0.013(4) -0.005(4) 0.003(4) 
O4 0.120(5) 0.061(4) 0.096(4) 0.011(3) -0.008(4) -0.008(3) 
C2 0.085(6) 0.070(6) 0.071(6) 0.030(4) 0.008(5) 0.004(5) 
C3 0.115(7) 0.090(7) 0.046(4) 0.015(4) -0.002(4) 0.016(5) 
O5 0.199(8) 0.113(5) 0.050(3) 0.022(3) 0.020(4) 0.005(5) 
C4 0.171(11) 0.088(7) 0.048(5) 0.009(4) -0.009(6) -0.016(7) 
C5 0.149(25) 0.149(23) 0.101(18) 0.048(16) -0.077(17) -0.064(19) 
C5A 0.311(52) 0.115(19) 0.044(11) -0.003(11) 0.051(18) -0.002(23) 
C6 0.040(3) 0.041(3) 0.056(4) 0.004(3) 0.005(3) 0.000(3) 
C7 0.040(4) 0.055(4) 0.071(5) 0.012(3) 0.013(3) -0.005(3) 
C8 0.040(4) 0.066(5) 0.084(6) 0.012(4) -0.011(4) 0.001(3) 
C9 0.055(4) 0.078(5) 0.070(5) 0.017(4) -0.016(4) -0.005(4) 
C10 0.052(4) 0.065(5) 0.051(4) 0.013(4) -0.003(3) -0.013(4) 
C11 0.033(3) 0.051(4) 0.051(4) 0.009(3) -0.003(3) -0.004(3) 
C12 0.037(3) 0.057(4) 0.042(3) 0.001(3) 0.000(3) -0.002(3) 
C13 0.058(4) 0.067(5) 0.047(4) 0.004(3) 0.009(3) 0.005(4) 
C14 0.074(5) 0.084(6) 0.054(5) 0.014(4) 0.019(4) 0.004(4) 
C15 0.069(5) 0.091(6) 0.058(5) -0.010(5) 0.015(4) 0.009(5) 
C16 0.085(6) 0.058(5) 0.082(6) -0.015(5) 0.007(5) 0.005(4) 
C17 0.068(5) 0.054(5) 0.063(5) 0.002(4) 0.004(4) -0.003(4) 
C18 0.046(3) 0.050(4) 0.036(3) 0.002(3) 0.008(3) -0.003(3) 
C19 0.062(5) 0.057(5) 0.052(4) 0.000(3) 0.004(4) -0.004(4) 
C20 0.094(7) 0.057(5) 0.075(6) 0.003(4) 0.014(5) 0.001(5) 
C21 0.120(8) 0.050(5) 0.080(6) -0.008(4) 0.031(6) -0.026(5) 
C22 0.075(6) 0.094(7) 0.068(5) -0.013(5) 0.012(5) -0.035(6) 
C23 0.053(4) 0.072(5) 0.061(4) -0.001(4) 0.005(3) -0.013(4) 
N2 0.078(4) 0.091(5) 0.059(4) -0.010(4) 0.005(3) -0.005(4) 
C31 0.110(8) 0.110(8) 0.102(8) -0.027(7) 0.008(6) -0.020(7) 
C32 0.131(10) 0.109(9) 0.110(8) 0.008(7) 0.012(7) -0.009(8) 
C33 0.166(13) 0.103(9) 0.146(11) -0.023(8) 0.038(10) -0.031(9) 
C34 0.227(18) 0.118(11) 0.199(16) -0.022(11) 0.089(14) -0.046(11) 
C35 0.107(8) 0.135(9) 0.093(7) -0.018(7) 0.013(6) -0.010(7) 
C36 0.120(9) 0.112(8) 0.086(7) 0.011(6) 0.012(6) -0.011(7) 
C37 0.149(11) 0.115(9) 0.078(7) 0.001(6) 0.004(7) -0.019(8) 
C38 0.214(16) 0.115(9) 0.100(8) 0.015(8) 0.012(10) -0.020(10) 
C39 0.144(10) 0.114(9) 0.095(7) -0.009(7) 0.038(7) 0.020(8) 
C40 0.214(16) 0.136(11) 0.154(13) -0.003(10) 0.067(12) 0.084(11) 
C43 0.121(9) 0.139(10) 0.091(7) -0.008(7) -0.006(7) -0.019(8) 
C44 0.095(8) 0.176(13) 0.134(11) -0.013(9) 0.006(8) 0.013(9) 
 
_geom_special_details 
; 
 All esds (except the esd in the dihedral angle between two l.s. planes) 
 are estimated using the full covariance matrix.  The cell esds are taken 
 into account individually in the estimation of esds in distances, angles 
 and torsion angles; correlations between esds in cell parameters are only 
 used when they are defined by crystal symmetry.  An approximate (isotropic) 
 treatment of cell esds is used for estimating esds involving l.s. planes. 
; 
 
loop_ 
 _geom_bond_atom_site_label_1 
 _geom_bond_atom_site_label_2 
 _geom_bond_distance 
 _geom_bond_site_symmetry_2 
 _geom_bond_publ_flag 
Re1 O1 1.692(5) . ? 
Re1 N1 2.007(5) . ? 
Re1 O2 2.076(4) . ? 
Re1 O3 2.126(5) . ? 
Re1 S1 2.294(2) . ? 
Re1 P 2.435(2) . ? 
O2 C6 1.313(7) . ? 
O3 C1 1.292(8) . ? 
P C11 1.778(6) . ? 
P C12 1.830(6) . ? 
P C18 1.834(6) . ? 
S1 C4 1.839(8) . ? 
N1 C3 1.345(10) . ? 
N1 C2 1.450(11) . ? 
C1 O4 1.227(9) . ? 
C1 C2 1.489(12) . ? 
C3 O5 1.226(9) . ? 
C3 C4 1.525(13) . ? 
C4 C5 1.37(2) . ? 
C4 C5A 1.38(2) . ? 
C5 C5A 1.88(4) . ? 
C6 C11 1.400(8) . ? 
C6 C7 1.411(9) . ? 
C7 C8 1.351(10) . ? 
C8 C9 1.370(11) . ? 
C9 C10 1.372(10) . ? 
C10 C11 1.394(9) . ? 
C12 C17 1.381(10) . ? 
C12 C13 1.393(9) . ? 
C13 C14 1.369(10) . ? 
C14 C15 1.372(12) . ? 
C15 C16 1.346(12) . ? 
C16 C17 1.386(11) . ? 
C18 C19 1.386(9) . ? 
C18 C23 1.392(9) . ? 
C19 C20 1.369(11) . ? 
C20 C21 1.363(14) . ? 
C21 C22 1.366(14) . ? 
C22 C23 1.377(12) . ? 
N2 C31 1.482(11) . ? 
N2 C43 1.497(12) . ? 
N2 C35 1.525(12) . ? 
N2 C39 1.545(12) . ? 
C31 C32 1.473(14) . ? 
C32 C33 1.531(15) . ? 
C33 C34 1.48(2) . ? 
C35 C36 1.475(14) . ? 
C36 C37 1.495(13) . ? 
C37 C38 1.444(15) . ? 
C39 C40 1.38(2) . ? 
C40 C41 1.54(2) . ? 
C41 C42 1.01(3) . ? 
C43 C44 1.46(2) . ? 
C44 C45 1.59(2) . ? 
C45 C46 1.28(3) . ? 
 
loop_ 
 _geom_angle_atom_site_label_1 
 _geom_angle_atom_site_label_2 
 _geom_angle_atom_site_label_3 
 _geom_angle 
 _geom_angle_site_symmetry_1 
 _geom_angle_site_symmetry_3 
 _geom_angle_publ_flag 
O1 Re1 N1 109.2(2) . . ? 
O1 Re1 O2 161.4(2) . . ? 
N1 Re1 O2 85.6(2) . . ? 
O1 Re1 O3 93.2(2) . . ? 
N1 Re1 O3 78.9(2) . . ? 
O2 Re1 O3 78.3(2) . . ? 
O1 Re1 S1 103.3(2) . . ? 
N1 Re1 S1 84.3(2) . . ? 
O2 Re1 S1 88.96(15) . . ? 
O3 Re1 S1 159.59(15) . . ? 
O1 Re1 P 89.0(2) . . ? 
N1 Re1 P 161.7(2) . . ? 
O2 Re1 P 76.08(12) . . ? 
O3 Re1 P 98.51(13) . . ? 
S1 Re1 P 93.74(7) . . ? 
C6 O2 Re1 126.6(4) . . ? 
C1 O3 Re1 115.6(5) . . ? 
C11 P C12 107.3(3) . . ? 
C11 P C18 107.7(3) . . ? 
C12 P C18 104.2(3) . . ? 
C11 P Re1 102.5(2) . . ? 
C12 P Re1 117.9(2) . . ? 
C18 P Re1 116.7(2) . . ? 
C4 S1 Re1 99.5(3) . . ? 
C3 N1 C2 120.0(7) . . ? 
C3 N1 Re1 123.2(5) . . ? 
C2 N1 Re1 116.3(5) . . ? 
O4 C1 O3 123.2(8) . . ? 
O4 C1 C2 119.7(7) . . ? 
O3 C1 C2 117.1(7) . . ? 
N1 C2 C1 111.9(6) . . ? 
O5 C3 N1 122.4(9) . . ? 
O5 C3 C4 120.2(8) . . ? 
N1 C3 C4 117.4(7) . . ? 
C5 C4 C5A 85.9(19) . . ? 
C5 C4 C3 110.8(13) . . ? 
C5A C4 C3 118.6(14) . . ? 
C5 C4 S1 115.2(12) . . ? 
C5A C4 S1 113.4(12) . . ? 
C3 C4 S1 110.9(6) . . ? 
C4 C5 C5A 47.2(12) . . ? 
C4 C5A C5 46.8(13) . . ? 
O2 C6 C11 120.9(5) . . ? 
O2 C6 C7 121.9(6) . . ? 
C11 C6 C7 117.2(6) . . ? 
C8 C7 C6 121.0(7) . . ? 
C7 C8 C9 121.6(7) . . ? 
C8 C9 C10 119.4(7) . . ? 
C9 C10 C11 120.4(7) . . ? 
C10 C11 C6 120.4(6) . . ? 
C10 C11 P 127.4(5) . . ? 
C6 C11 P 112.2(4) . . ? 
C17 C12 C13 119.0(7) . . ? 
C17 C12 P 119.4(5) . . ? 
C13 C12 P 121.5(5) . . ? 
C14 C13 C12 120.2(7) . . ? 
C13 C14 C15 120.1(8) . . ? 
C16 C15 C14 120.1(8) . . ? 
C15 C16 C17 121.2(8) . . ? 
C12 C17 C16 119.3(8) . . ? 
C19 C18 C23 119.4(7) . . ? 
C19 C18 P 122.2(5) . . ? 
C23 C18 P 118.4(5) . . ? 
C20 C19 C18 120.4(8) . . ? 
C21 C20 C19 120.5(9) . . ? 
C20 C21 C22 119.2(8) . . ? 
C21 C22 C23 122.1(9) . . ? 
C22 C23 C18 118.3(8) . . ? 
C31 N2 C43 114.2(8) . . ? 
C31 N2 C35 110.8(7) . . ? 
C43 N2 C35 107.6(8) . . ? 
C31 N2 C39 106.7(8) . . ? 
C43 N2 C39 106.2(8) . . ? 
C35 N2 C39 111.3(8) . . ? 
C32 C31 N2 117.6(9) . . ? 
C31 C32 C33 112.9(10) . . ? 
C34 C33 C32 111.3(12) . . ? 
C36 C35 N2 118.2(9) . . ? 
C35 C36 C37 111.3(10) . . ? 
C38 C37 C36 118.3(12) . . ? 
C40 C39 N2 120.2(12) . . ? 
C39 C40 C41 114.5(17) . . ? 
C42 C41 C40 128.5(28) . . ? 
C44 C43 N2 116.3(10) . . ? 
C43 C44 C45 108.5(12) . . ? 
C46 C45 C44 114.3(19) . . ? 
 
_refine_diff_density_max    0.706 
_refine_diff_density_min   -0.575 
_refine_diff_density_rms    0.085 

#===END

COMPOUND  2

 
data_shel93                                             
 
_audit_creation_method            SHELXL 
_chemical_name_systematic 
; 
 ? 
; 
_chemical_name_common             ? 
_chemical_formula_moiety          ? 
_chemical_formula_structural      ? 
_chemical_formula_analytical      [ReO(H2NCONCH2COO){P(C6H4O)(C6H5)2}] 
_chemical_formula_sum             'C22 H20 N2 O5 P Re' 
_chemical_formula_weight          609.57 
_chemical_melting_point           ? 
_chemical_compound_source         ? 
 
loop_ 
 _atom_type_symbol 
 _atom_type_description 
 _atom_type_scat_dispersion_real 
 _atom_type_scat_dispersion_imag 
 _atom_type_scat_source 
 'C'  'C'   0.0033   0.0016 
 'International Tables Vol C Tables 4.2.6.8 and 6.1.1.4' 
 'H'  'H'   0.0000   0.0000 
 'International Tables Vol C Tables 4.2.6.8 and 6.1.1.4' 
 'N'  'N'   0.0061   0.0033 
 'International Tables Vol C Tables 4.2.6.8 and 6.1.1.4' 
 'O'  'O'   0.0106   0.0060 
 'International Tables Vol C Tables 4.2.6.8 and 6.1.1.4' 
 'P'  'P'   0.1023   0.0942 
 'International Tables Vol C Tables 4.2.6.8 and 6.1.1.4' 
 'Re'  'Re'  -1.0185   7.2310 
 'International Tables Vol C Tables 4.2.6.8 and 6.1.1.4' 
 
_symmetry_cell_setting            'monoclinic' 
_symmetry_space_group_name_H-M    P21/c 
 
loop_ 
 _symmetry_equiv_pos_as_xyz 
 'x, y, z' 
 'x, -y+1/2, z+1/2' 
 '-x, -y, -z' 
 '-x, y-1/2, -z-1/2' 
 
_cell_length_a                    10.135(6) 
_cell_length_b                    13.266(7) 
_cell_length_c                    15.679(8) 
_cell_angle_alpha                 90.00 
_cell_angle_beta                  99.33(2) 
_cell_angle_gamma                 90.00 
_cell_volume                      2080(2) 
_cell_formula_units_Z             4 
_cell_measurement_temperature     298 
_cell_measurement_reflns_used     25 
_cell_measurement_theta_min       5.4 
_cell_measurement_theta_max       11.6 
 
_exptl_crystal_description        'parallelipiped' 
_exptl_crystal_colour             'red' 
_exptl_crystal_size_max           0.35 
_exptl_crystal_size_mid           0.15 
_exptl_crystal_size_min           0.08 
_exptl_crystal_density_meas       ? 
_exptl_crystal_density_diffrn     1.947 
_exptl_crystal_density_method     ? 
_exptl_crystal_F_000              1184 
_exptl_absorpt_coefficient_mu     5.957 
_exptl_absorpt_correction_type    'psi-scan empirical' 
_exptl_absorpt_correction_T_min   0.78 
_exptl_absorpt_correction_T_max   1.00 
 
_exptl_special_details 
; 
 ? 
; 
 
_diffrn_ambient_temperature       298 
_diffrn_radiation_wavelength      0.71073 
_diffrn_radiation_type            MoK\a 
_diffrn_radiation_source          'fine-focus sealed tube' 
_diffrn_radiation_monochromator   graphite 
_diffrn_measurement_device        'Crystal Logic Dual Goniometer diffractometer'  
_diffrn_measurement_method        'theta-2theta scans' 
_diffrn_standards_number          3 
_diffrn_standards_interval_count  97 
_diffrn_standards_interval_time   ? 
_diffrn_standards_decay_%         -0.3 
_diffrn_reflns_number             3584 
_diffrn_reflns_av_R_equivalents   0.0341 
_diffrn_reflns_av_sigmaI/netI     0.0462 
_diffrn_reflns_limit_h_min        -11 
_diffrn_reflns_limit_h_max        11 
_diffrn_reflns_limit_k_min        -15 
_diffrn_reflns_limit_k_max        0 
_diffrn_reflns_limit_l_min        -18 
_diffrn_reflns_limit_l_max        0 
_diffrn_reflns_theta_min          2.02 
_diffrn_reflns_theta_max          24.50 
_reflns_number_total              3446 
_reflns_number_observed           3073 
_reflns_observed_criterion        >2sigma(I) 
 
_computing_data_collection        'Program COLLECT (UCLA Crystallographic package, C.E.Strouse, 1994)' 
_computing_cell_refinement        'Program LEAST (UCLA Crystallographic package, C.E.Strouse, 1994)'
_computing_data_reduction         'Program REDUCE (UCLA Crystallographic package, C.E.Strouse, 1994)'
_computing_structure_solution     'SHELXS-86 (Sheldrick, 1990)' 
_computing_structure_refinement   'SHELXL-93 (Sheldrick, 1993)' 
_computing_molecular_graphics     'ORTEP' 
_computing_publication_material   ? 
 
_refine_special_details 
; 
 Refinement on F^2^ for ALL reflections except for 0 with very negative F^2^ 
 or flagged by the user for potential systematic errors.  Weighted R-factors 
 wR and all goodnesses of fit S are based on F^2^, conventional R-factors R 
 are based on F, with F set to zero for negative F^2^. The observed criterion 
 of F^2^ > 2sigma(F^2^) is used only for calculating _R_factor_obs etc. and is 
 not relevant to the choice of reflections for refinement.  R-factors based 
 on F^2^ are statistically about twice as large as those based on F, and R- 
 factors based on ALL data will be even larger. 
; 
 
_refine_ls_structure_factor_coef  Fsqd  
_refine_ls_matrix_type            full 
_refine_ls_weighting_scheme 
 'calc w=1/[\s^2^(Fo^2^)+(0.0410P)^2^+0.7373P] where P=(Fo^2^+2Fc^2^)/3' 
_atom_sites_solution_primary      direct 
_atom_sites_solution_secondary    difmap 
_atom_sites_solution_hydrogens    geom 
_refine_ls_hydrogen_treatment     ? 
_refine_ls_extinction_method      none 
_refine_ls_extinction_coef        ? 
_refine_ls_number_reflns          3446 
_refine_ls_number_parameters      360 
_refine_ls_number_restraints      0 
_refine_ls_R_factor_all           0.0352 
_refine_ls_R_factor_obs           0.0296 
_refine_ls_wR_factor_all          0.0802 
_refine_ls_wR_factor_obs          0.0763 
_refine_ls_goodness_of_fit_all    1.098 
_refine_ls_goodness_of_fit_obs    1.114 
_refine_ls_restrained_S_all       1.098 
_refine_ls_restrained_S_obs       1.114 
_refine_ls_shift/esd_max          0.026 
_refine_ls_shift/esd_mean         0.002 
 
loop_ 
 _atom_site_label 
 _atom_site_type_symbol 
 _atom_site_fract_x 
 _atom_site_fract_y 
 _atom_site_fract_z 
 _atom_site_U_iso_or_equiv 
 _atom_site_thermal_displace_type 
 _atom_site_occupancy 
 _atom_site_calc_flag 
 _atom_site_refinement_flags 
 _atom_site_disorder_group 
Re Re 0.09145(2) 0.093460(14) 0.213183(11) 0.02658(11) Uani 1 d . . 
O1 O 0.1918(4) 0.1666(3) 0.1640(2) 0.0415(9) Uani 1 d . . 
P P 0.28074(12) 0.05788(10) 0.32816(8) 0.0270(3) Uani 1 d . . 
O2 O 0.0146(3) -0.0096(3) 0.2871(2) 0.0319(8) Uani 1 d . . 
N1 N 0.1098(5) -0.0380(4) 0.1359(3) 0.0330(10) Uani 1 d . . 
N2 N -0.0894(5) 0.0928(3) 0.1412(3) 0.0325(10) Uani 1 d . . 
O5 O -0.0004(4) 0.1985(3) 0.2790(2) 0.0378(9) Uani 1 d . . 
C1 C -0.0260(6) -0.0656(4) 0.0901(4) 0.0359(12) Uani 1 d . . 
C2 C -0.1228(5) 0.0203(4) 0.0816(3) 0.0282(10) Uani 1 d . . 
O3 O -0.2246(4) 0.0210(3) 0.0266(2) 0.0397(9) Uani 1 d . . 
C3 C -0.1803(5) 0.1723(4) 0.1581(3) 0.0345(11) Uani 1 d . . 
C4 C -0.1227(5) 0.2228(4) 0.2428(3) 0.0347(11) Uani 1 d . . 
O4 O -0.1902(4) 0.2831(3) 0.2759(3) 0.0510(10) Uani 1 d . . 
C5 C 0.0711(5) -0.0441(4) 0.3651(3) 0.0290(10) Uani 1 d . . 
C6 C -0.0016(6) -0.1069(4) 0.4128(4) 0.0401(13) Uani 1 d . . 
C7 C 0.0552(6) -0.1354(5) 0.4949(4) 0.048(2) Uani 1 d . . 
C8 C 0.1826(7) -0.1039(5) 0.5320(4) 0.047(2) Uani 1 d . . 
C9 C 0.2553(5) -0.0448(5) 0.4848(3) 0.0380(12) Uani 1 d . . 
C10 C 0.2015(5) -0.0160(4) 0.4005(3) 0.0316(11) Uani 1 d . . 
C11 C 0.4166(4) -0.0129(4) 0.2946(3) 0.0294(11) Uani 1 d . . 
C12 C 0.4795(7) -0.0923(4) 0.3425(4) 0.0415(14) Uani 1 d . . 
C13 C 0.5894(7) -0.1389(6) 0.3176(4) 0.056(2) Uani 1 d . . 
C14 C 0.6376(7) -0.1056(5) 0.2448(5) 0.055(2) Uani 1 d . . 
C15 C 0.5753(6) -0.0286(5) 0.1965(4) 0.0463(14) Uani 1 d . . 
C16 C 0.4644(6) 0.0173(4) 0.2200(4) 0.0399(13) Uani 1 d . . 
C17 C 0.3643(5) 0.1621(4) 0.3900(3) 0.0312(11) Uani 1 d . . 
C18 C 0.4943(5) 0.1910(4) 0.3843(4) 0.0400(13) Uani 1 d . . 
C19 C 0.5526(6) 0.2728(5) 0.4321(5) 0.052(2) Uani 1 d . . 
C20 C 0.4837(7) 0.3258(5) 0.4849(4) 0.050(2) Uani 1 d . . 
C21 C 0.3534(7) 0.2977(5) 0.4908(4) 0.051(2) Uani 1 d . . 
C22 C 0.2944(6) 0.2175(5) 0.4433(4) 0.0433(13) Uani 1 d . . 
HN1A H 0.1638(52) -0.0257(40) 0.0981(34) 0.027(14) Uiso 1 d . . 
HN1B H 0.1316(57) -0.0874(39) 0.1601(38) 0.023(15) Uiso 1 d . . 
H1A H -0.0300(67) -0.0913(42) 0.0342(46) 0.051(19) Uiso 1 d . . 
H1B H -0.0627(49) -0.1132(37) 0.1152(32) 0.018(12) Uiso 1 d . . 
H3A H -0.2711(56) 0.1445(42) 0.1630(33) 0.034(14) Uiso 1 d . . 
H3B H -0.1905(58) 0.2256(46) 0.1096(39) 0.049(17) Uiso 1 d . . 
H6 H -0.0922(62) -0.1353(48) 0.3841(37) 0.046(16) Uiso 1 d . . 
H7 H 0.0111(58) -0.1726(47) 0.5292(37) 0.043(16) Uiso 1 d . . 
H8 H 0.2165(50) -0.1336(39) 0.5942(32) 0.026(12) Uiso 1 d . . 
H9 H 0.3517(60) -0.0232(43) 0.5097(36) 0.042(15) Uiso 1 d . . 
H12 H 0.4384(53) -0.1164(38) 0.3897(35) 0.027(13) Uiso 1 d . . 
H13 H 0.6458(95) -0.1868(76) 0.3604(61) 0.114(32) Uiso 1 d . . 
H14 H 0.7202(103) -0.1288(72) 0.2348(61) 0.111(32) Uiso 1 d . . 
H15 H 0.6134(64) -0.0077(49) 0.1430(41) 0.055(18) Uiso 1 d . . 
H16 H 0.3998(72) 0.0710(53) 0.1803(45) 0.065(21) Uiso 1 d . . 
H18 H 0.5478(53) 0.1538(42) 0.3451(35) 0.037(15) Uiso 1 d . . 
H19 H 0.6386(71) 0.2878(52) 0.4316(41) 0.060(20) Uiso 1 d . . 
H20 H 0.5167(90) 0.3955(55) 0.5107(58) 0.089(28) Uiso 1 d . . 
H21 H 0.3102(61) 0.3414(50) 0.5209(39) 0.049(17) Uiso 1 d . . 
H22 H 0.2173(57) 0.1912(43) 0.4536(34) 0.037(15) Uiso 1 d . . 
 
loop_ 
 _atom_site_aniso_label 
 _atom_site_aniso_U_11 
 _atom_site_aniso_U_22 
 _atom_site_aniso_U_33 
 _atom_site_aniso_U_23 
 _atom_site_aniso_U_13 
 _atom_site_aniso_U_12 
Re 0.02752(15) 0.02602(15) 0.02474(15) 0.00126(7) -0.00014(9) 0.00006(7) 
O1 0.045(2) 0.038(2) 0.040(2) 0.010(2) 0.001(2) -0.001(2) 
P 0.0230(6) 0.0306(7) 0.0266(6) 0.0034(5) 0.0011(5) 0.0000(5) 
O2 0.031(2) 0.031(2) 0.032(2) 0.004(2) 0.0007(15) -0.0011(15) 
N1 0.039(3) 0.030(2) 0.030(2) 0.004(2) 0.006(2) 0.007(2) 
N2 0.035(2) 0.035(3) 0.025(2) -0.002(2) -0.003(2) 0.002(2) 
O5 0.043(2) 0.034(2) 0.034(2) -0.008(2) -0.003(2) 0.003(2) 
C1 0.045(3) 0.031(3) 0.032(3) -0.004(2) 0.008(2) -0.005(3) 
C2 0.031(3) 0.028(3) 0.026(2) 0.001(2) 0.006(2) -0.006(2) 
O3 0.037(2) 0.044(2) 0.035(2) -0.005(2) -0.006(2) -0.001(2) 
C3 0.032(3) 0.033(3) 0.037(3) -0.005(2) -0.002(2) 0.005(2) 
C4 0.038(3) 0.023(3) 0.042(3) 0.000(2) 0.003(2) 0.000(2) 
O4 0.047(2) 0.039(2) 0.067(3) -0.020(2) 0.006(2) 0.004(2) 
C5 0.029(3) 0.029(3) 0.029(2) 0.004(2) 0.005(2) 0.005(2) 
C6 0.035(3) 0.046(3) 0.041(3) 0.008(3) 0.013(3) 0.003(2) 
C7 0.046(3) 0.050(4) 0.053(4) 0.024(3) 0.020(3) 0.010(3) 
C8 0.047(4) 0.058(4) 0.038(3) 0.019(3) 0.012(3) 0.014(3) 
C9 0.033(3) 0.047(3) 0.033(3) 0.006(3) 0.002(2) 0.005(3) 
C10 0.028(3) 0.034(3) 0.034(3) 0.006(2) 0.008(2) 0.004(2) 
C11 0.026(3) 0.030(3) 0.031(3) -0.005(2) 0.003(2) -0.004(2) 
C12 0.047(4) 0.044(3) 0.034(3) 0.003(2) 0.009(3) 0.010(3) 
C13 0.060(4) 0.057(4) 0.053(4) 0.005(3) 0.013(3) 0.025(3) 
C14 0.038(4) 0.061(4) 0.068(5) -0.017(3) 0.014(3) 0.008(3) 
C15 0.050(4) 0.043(3) 0.051(3) -0.004(3) 0.023(3) -0.002(3) 
C16 0.043(3) 0.040(3) 0.039(3) -0.001(3) 0.013(2) 0.003(3) 
C17 0.033(3) 0.029(3) 0.029(3) 0.002(2) -0.004(2) 0.001(2) 
C18 0.027(3) 0.043(3) 0.048(3) -0.009(3) 0.001(2) 0.000(2) 
C19 0.035(3) 0.045(3) 0.071(4) -0.008(3) -0.008(3) -0.004(3) 
C20 0.060(4) 0.032(3) 0.050(4) -0.006(3) -0.013(3) -0.003(3) 
C21 0.071(4) 0.039(3) 0.044(3) -0.007(3) 0.011(3) 0.010(3) 
C22 0.038(3) 0.050(4) 0.045(3) -0.006(3) 0.015(3) -0.003(3) 
 
_geom_special_details 
; 
 All esds (except the esd in the dihedral angle between two l.s. planes) 
 are estimated using the full covariance matrix.  The cell esds are taken 
 into account individually in the estimation of esds in distances, angles 
 and torsion angles; correlations between esds in cell parameters are only 
 used when they are defined by crystal symmetry.  An approximate (isotropic) 
 treatment of cell esds is used for estimating esds involving l.s. planes. 
; 
 
loop_ 
 _geom_bond_atom_site_label_1 
 _geom_bond_atom_site_label_2 
 _geom_bond_distance 
 _geom_bond_site_symmetry_2 
 _geom_bond_publ_flag 
Re O1 1.681(4) . ? 
Re N2 1.991(5) . ? 
Re O2 2.028(3) . ? 
Re O5 2.046(4) . ? 
Re N1 2.148(5) . ? 
Re P 2.456(2) . ? 
P C10 1.785(5) . ? 
P C11 1.813(5) . ? 
P C17 1.817(5) . ? 
O2 C5 1.344(6) . ? 
N1 C1 1.491(7) . ? 
N2 C2 1.346(6) . ? 
N2 C3 1.452(7) . ? 
O5 C4 1.317(6) . ? 
C1 C2 1.495(8) . ? 
C2 O3 1.232(6) . ? 
C3 C4 1.517(7) . ? 
C4 O4 1.222(6) . ? 
C5 C10 1.398(7) . ? 
C5 C6 1.405(7) . ? 
C6 C7 1.376(9) . ? 
C7 C8 1.392(10) . ? 
C8 C9 1.372(8) . ? 
C9 C10 1.399(7) . ? 
C11 C12 1.388(8) . ? 
C11 C16 1.396(7) . ? 
C12 C13 1.384(9) . ? 
C13 C14 1.385(10) . ? 
C14 C15 1.364(10) . ? 
C15 C16 1.380(8) . ? 
C17 C18 1.389(7) . ? 
C17 C22 1.391(7) . ? 
C18 C19 1.395(8) . ? 
C19 C20 1.363(9) . ? 
C20 C21 1.390(9) . ? 
C21 C22 1.377(9) . ? 
 
loop_ 
 _geom_angle_atom_site_label_1 
 _geom_angle_atom_site_label_2 
 _geom_angle_atom_site_label_3 
 _geom_angle 
 _geom_angle_site_symmetry_1 
 _geom_angle_site_symmetry_3 
 _geom_angle_publ_flag 
O1 Re N2 108.2(2) . . ? 
O1 Re O2 165.6(2) . . ? 
N2 Re O2 85.3(2) . . ? 
O1 Re O5 101.3(2) . . ? 
N2 Re O5 80.6(2) . . ? 
O2 Re O5 85.6(2) . . ? 
O1 Re N1 95.5(2) . . ? 
N2 Re N1 80.4(2) . . ? 
O2 Re N1 81.5(2) . . ? 
O5 Re N1 157.7(2) . . ? 
O1 Re P 89.38(14) . . ? 
N2 Re P 162.42(13) . . ? 
O2 Re P 77.14(11) . . ? 
O5 Re P 97.23(11) . . ? 
N1 Re P 97.43(13) . . ? 
C10 P C11 110.0(2) . . ? 
C10 P C17 107.3(2) . . ? 
C11 P C17 103.8(2) . . ? 
C10 P Re 101.2(2) . . ? 
C11 P Re 115.2(2) . . ? 
C17 P Re 119.1(2) . . ? 
C5 O2 Re 127.1(3) . . ? 
C1 N1 Re 108.3(3) . . ? 
C2 N2 C3 123.4(4) . . ? 
C2 N2 Re 120.1(3) . . ? 
C3 N2 Re 116.5(3) . . ? 
C4 O5 Re 115.0(3) . . ? 
N1 C1 C2 113.4(4) . . ? 
O3 C2 N2 124.6(5) . . ? 
O3 C2 C1 122.1(5) . . ? 
N2 C2 C1 113.3(4) . . ? 
N2 C3 C4 108.4(4) . . ? 
O4 C4 O5 122.0(5) . . ? 
O4 C4 C3 119.9(5) . . ? 
O5 C4 C3 118.1(4) . . ? 
O2 C5 C10 120.4(4) . . ? 
O2 C5 C6 120.2(5) . . ? 
C10 C5 C6 119.4(5) . . ? 
C7 C6 C5 119.0(6) . . ? 
C6 C7 C8 121.8(6) . . ? 
C9 C8 C7 119.3(6) . . ? 
C8 C9 C10 120.4(5) . . ? 
C9 C10 C5 120.0(5) . . ? 
C9 C10 P 127.2(4) . . ? 
C5 C10 P 112.8(4) . . ? 
C12 C11 C16 118.6(5) . . ? 
C12 C11 P 122.7(4) . . ? 
C16 C11 P 118.6(4) . . ? 
C13 C12 C11 120.5(6) . . ? 
C12 C13 C14 119.8(6) . . ? 
C15 C14 C13 120.2(6) . . ? 
C14 C15 C16 120.4(6) . . ? 
C15 C16 C11 120.3(6) . . ? 
C18 C17 C22 118.2(5) . . ? 
C18 C17 P 122.7(4) . . ? 
C22 C17 P 119.0(4) . . ? 
C17 C18 C19 120.3(5) . . ? 
C20 C19 C18 120.9(6) . . ? 
C19 C20 C21 119.2(6) . . ? 
C22 C21 C20 120.4(6) . . ? 
C21 C22 C17 121.0(6) . . ? 
 
_refine_diff_density_max    0.782 
_refine_diff_density_min   -0.932 
_refine_diff_density_rms    0.135 

#===END
